# Supplementary material
Source: PubMed Central journal article supplement (PMC6985741)
Supplement: AAC.01730-19-s0001.pdf [file AAC.01730-19-s0001.pdf]

1 **Supplemental material**

2 **Fig. S1. Gentamicin concentrations vs. time after dose between the oncology and non-**  
3 **oncology patients stratified by post-natal age (PNA), fat-free mass (FFM) and serum**  
4 **creatinine concentration (SCR).**

5

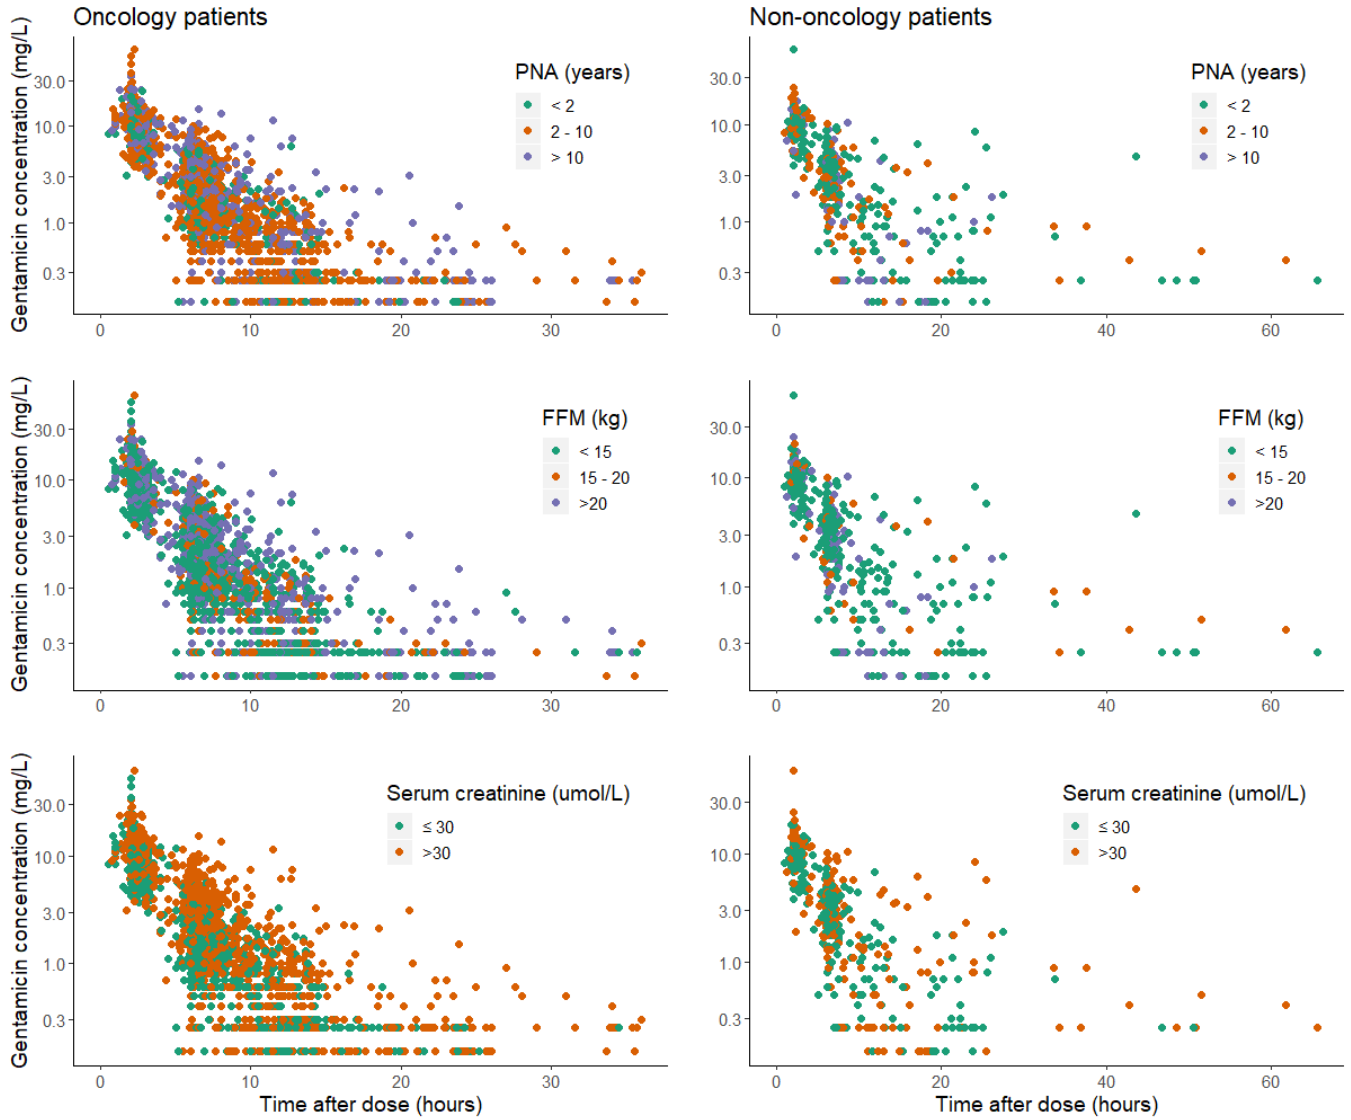

6

7 Fig. S2 Reasons for admission in 115 paediatric non-oncology patients.

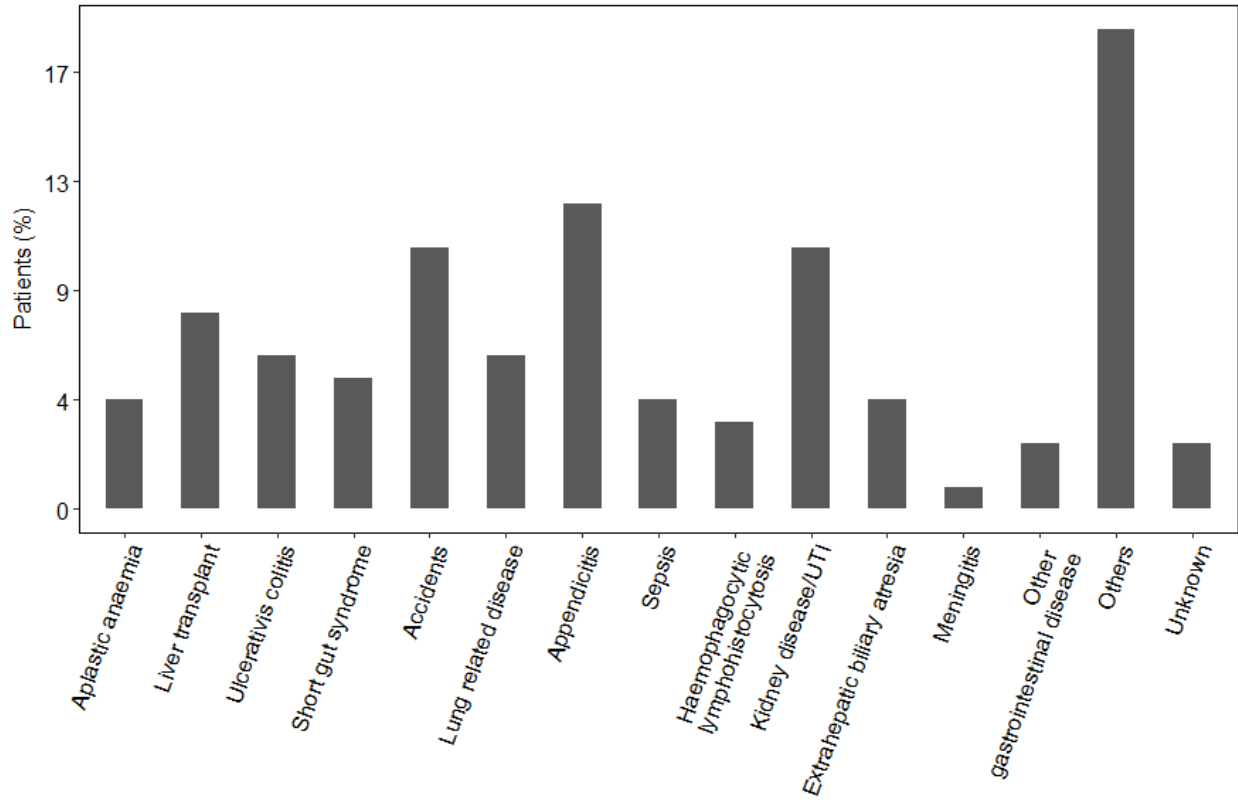

9 **Fig. S3. Sampling importance ratio results to obtain parameter uncertainty of the FREM.**

10 The covariance step failed when running the FREM model and the SIR technique was applied to  
 11 obtain parameter-covariate uncertainty. This plot displays the distribution of the  $\Delta$ OFVs for the  
 12 five proposal uncertainty estimates obtained in the FREM (dotted coloured lines) and five posterior  
 13 uncertainties (solid coloured lines) for different quantiles. The solid black line represents a chi-  
 14 square distribution with degrees of freedom equal to the number of estimated parameters and it is  
 15 used as a reference. The estimated degree of freedom for each distribution is displayed at the  
 16 bottom right of the plot.

17

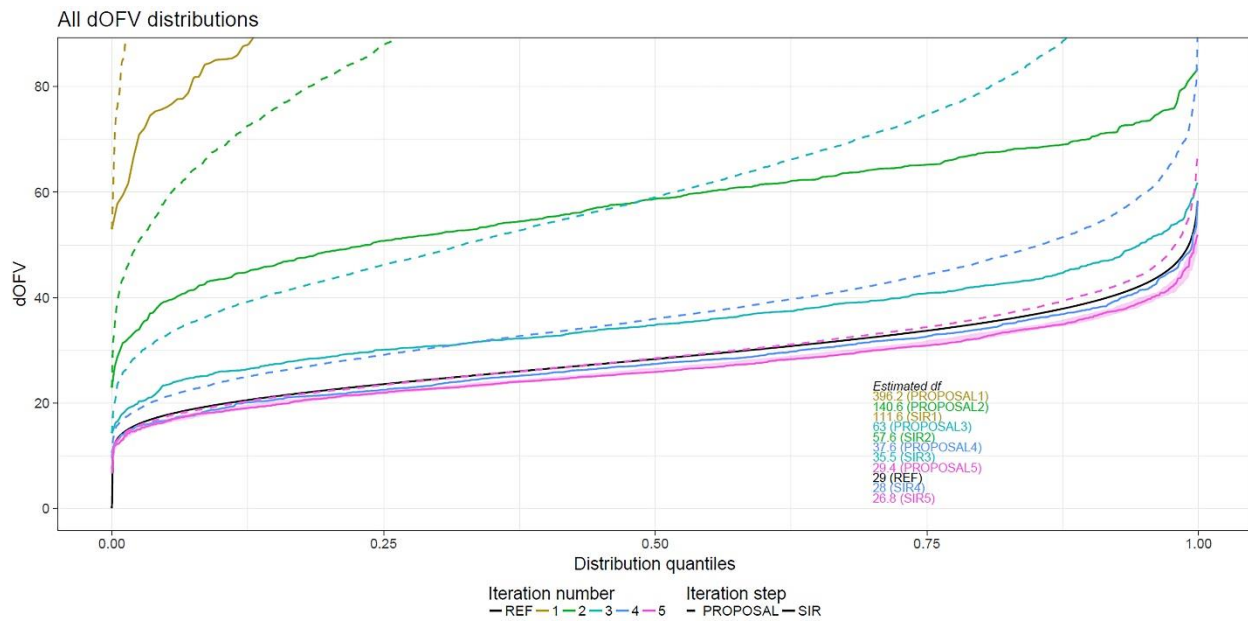

18

19 **Fig. S4. Sampling importance ratio results to obtain parameter uncertainty for the final**  
 20 **model of gentamicin in oncology and non-oncology patients.**

21 Distribution of the  $\Delta$ OFV for the five proposals (dotted coloured lines) and five posterior  
 22 uncertainties (solid coloured lines) of the SIR procedure for different quantiles. The solid grey line  
 23 represents a chi-square distribution with degrees of freedom equal to the number of estimated  
 24 parameters and it is used as a reference. The estimated degree of freedom for each distribution is  
 25 displayed at the bottom right of the plot.

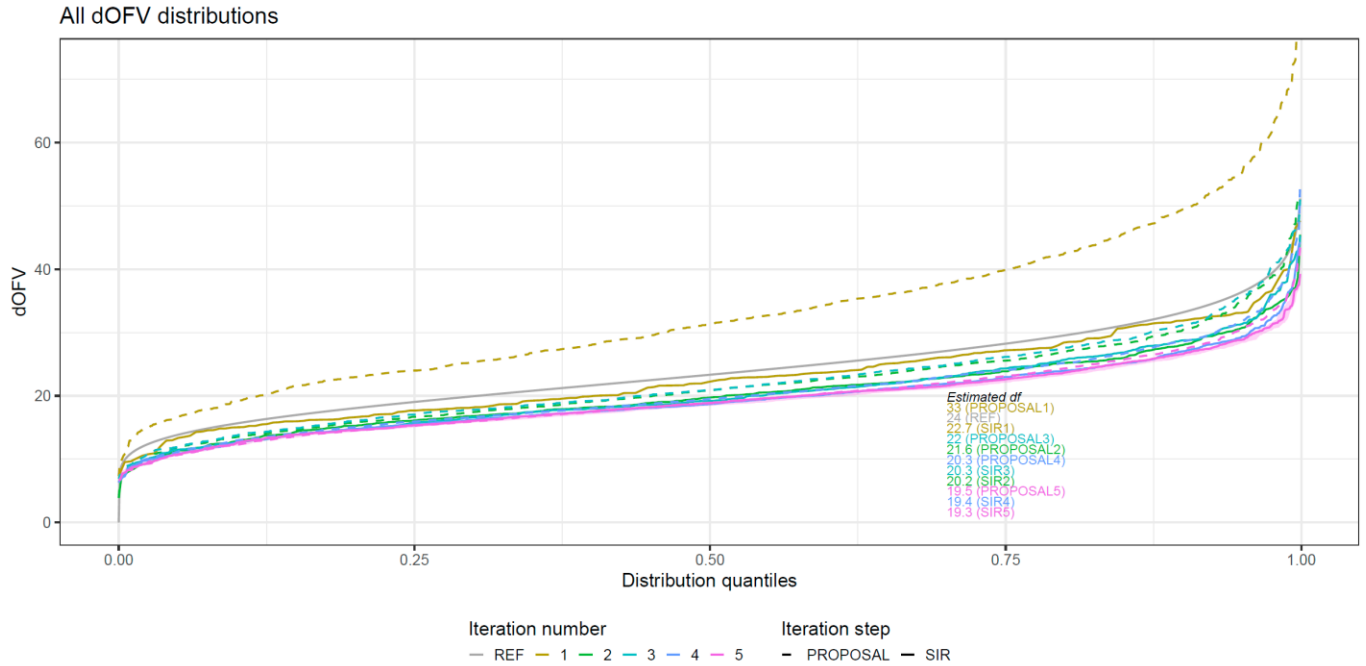

27 **Fig. S5.** Simulations (n=1,000) following once daily dosing of 7.5 mg/kg/q24h, 9 mg/kg/q24h, 10  
28 mg/kg/q24h and 12 mg/kg/q24h of gentamicin showing the median concentration-time profile of  
29 gentamicin in oncology (red line) and non-oncology patients (blue line).

30

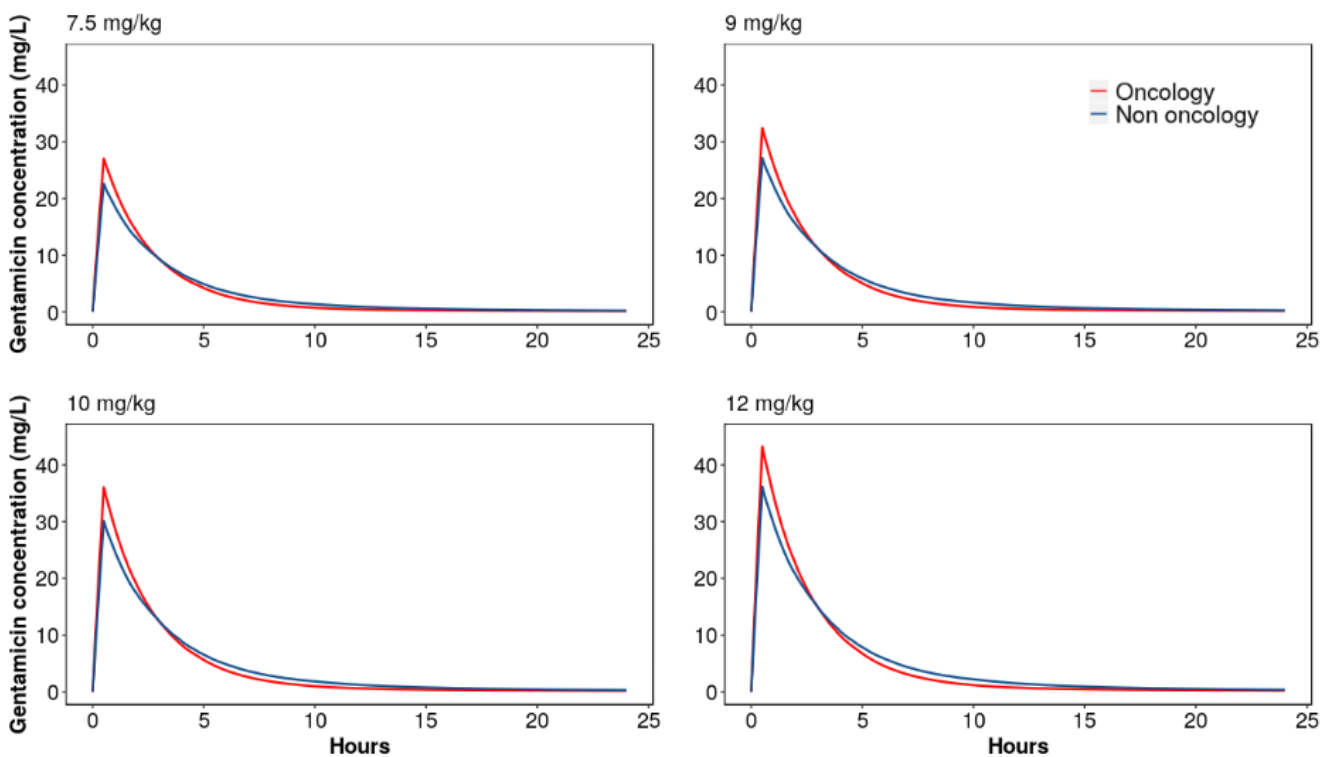

31
